# Supplementary material
Source: ML conference proceedings conference paper supplement (https://proceedings.neurips.cc/paper_files/paper/2016/hash/7f100b7b36092fb9b06dfb4fac360931-Abstract.html)
Supplement: Supplementary file [file 7f100b7b36092fb9b06dfb4fac360931-Supplemental.zip]

## Supplementary Material for “Variational Information Maximization for Feature Selection”

### A Detailed Algorithm for Variational Forward Feature Selection

We describe the detailed algorithm for our approach. We also provide open source code implementing  $\mathcal{VM}\mathcal{I}_{naive}$  and  $\mathcal{VM}\mathcal{I}_{pairwise}$  [24].

Concretely, let us suppose class label  $\mathbf{y}$  is discrete and has  $L$  different values  $\{y_1, y_2, \dots, y_L\}$ ; then we define the distribution  $q(\mathbf{x}_{S^t}|\mathbf{y})$  vector  $Q_t^{(k)}$  of size  $L$  for each sample  $(\mathbf{x}^{(k)}, \mathbf{y}^{(k)})$  at step  $t$ :

$$Q_t^{(k)} = \left[ \hat{q}(\mathbf{x}_{S^t}^{(k)}|\mathbf{y} = y_1), \dots, \hat{q}(\mathbf{x}_{S^t}^{(k)}|\mathbf{y} = y_L) \right]^T \quad (20)$$

where  $\mathbf{x}_{S^t}^{(k)}$  denotes the sample  $\mathbf{x}^{(k)}$  projects onto the  $\mathbf{x}_{S^t}$  feature space.

Also, We further denote  $\mathbf{Y}$  of size  $L \times 1$  as the distribution vector of  $\mathbf{y}$  as follows:

$$\mathbf{Y} = [\hat{p}(\mathbf{y} = y_1), \hat{p}(\mathbf{y} = y_2), \dots, \hat{p}(\mathbf{y} = y_L)]^T \quad (21)$$

Then we are able to rewrite  $q(\mathbf{x}_{S^{t-1}})$  and  $q(\mathbf{x}_{S^{t-1}}|\mathbf{y})$  in terms of  $Q_{t-1}^{(k)}$ ,  $\mathbf{Y}$  and substitute them into  $\hat{I}_{LB}(\mathbf{x}_{S^{t-1}} : \mathbf{y})$ .

To illustrate, at step  $t - 1$  we have,

$$\hat{I}_{LB}(\mathbf{x}_{S^{t-1}} : \mathbf{y}) = \frac{1}{N} \sum_{\mathbf{x}^{(k)}, \mathbf{y}^{(k)}} \log \left( p(\mathbf{x}_{S^{t-1}}^{(k)}|\mathbf{y} = \mathbf{y}^{(k)}) \right) - \frac{1}{N} \sum_k \log \left( \mathbf{Y}^T Q_{t-1}^{(k)} \right) \quad (22)$$

To select a feature  $i$  at step  $t$ , let us define the conditional distribution vector  $C_{i,t-1}^{(k)}$  for each feature  $i \notin S^{t-1}$  and each sample  $(\mathbf{x}^{(k)}, \mathbf{y}^{(k)})$ , i.e.,

$$C_{i,t-1}^{(k)} = \left[ q(\mathbf{x}_i^{(k)}|\mathbf{x}_{S^{t-1}}^{(k)}, \mathbf{y} = y_1), \dots, q(\mathbf{x}_i^{(k)}|\mathbf{x}_{S^{t-1}}^{(k)}, \mathbf{y} = y_L) \right]^T \quad (23)$$

At step  $t$ , we use  $C_{i,t-1}^{(k)}$  and  $Q_{t-1}^{(k)}$  previously stored and get,

$$\begin{aligned} \hat{I}_{LB}(\mathbf{x}_{S^{t-1} \cup i} : \mathbf{y}) &= \frac{1}{N} \sum_{\mathbf{x}^{(k)}, \mathbf{y}^{(k)}} \log \left( p(\mathbf{x}_{S^{t-1}}^{(k)}|\mathbf{y} = \mathbf{y}^{(k)}) p(\mathbf{x}_i^{(k)}|\mathbf{x}_{S^{t-1}}^{(k)}, \mathbf{y} = \mathbf{y}^{(k)}) \right) \\ &\quad - \frac{1}{N} \sum_k \log \left( \mathbf{Y}^T \text{diag} \left( Q_{t-1}^{(k)} \right) C_{i,t-1}^{(k)} \right) \end{aligned} \quad (24)$$

We summarize our detailed implementation in Algorithm 1.

Updating  $Q_t^{(k)}$  and  $C_{i,t}^{(k)}$  in Algorithm 1 may vary according to different  $Q$ -distributions. But we can verify that under Naive Bayes  $Q$ -distribution or pairwise  $Q$ -distribution,  $Q_t^{(k)}$  and  $C_{i,t}^{(k)}$  can be obtained recursively from  $Q_{t-1}^{(k)}$  and  $C_{i,t-1}^{(k)}$  by noticing that  $q(\mathbf{x}_i|\mathbf{x}_{S^t}, \mathbf{y}) = p(\mathbf{x}_i|\mathbf{y})$  for Naive Bayes  $Q$ -distribution and  $q(\mathbf{x}_i|\mathbf{x}_{S^t}, \mathbf{y}) = \left( p(\mathbf{x}_i|\mathbf{x}_{f_t}, \mathbf{y}) q(\mathbf{x}_i|\mathbf{x}_{S^{t-1}}, \mathbf{y})^{t-1} \right)^t$  for pairwise  $Q$ -distribution.

Let us denote  $N$  as number of samples,  $D$  as total number of features,  $T$  as number of selected features and  $L$  as number of distinct values in class variable  $\mathbf{y}$ . The computational complexity of Algorithm 1 involves calculating the lower bound for each feature  $i$  at every step which is  $O(NDL)$ ; updating  $C_{i,t}^{(k)}$  would cost  $O(NDL)$  for pairwise  $Q$ -distribution and  $O(1)$  for Naive Bayes  $Q$ -distribution; updating  $Q_t^{(k)}$  would cost  $O(NDL)$ . We need to select  $T$  features, therefore the time complexity is  $O(NDT)$ .<sup>2</sup>

<sup>2</sup>We ignore  $L$  here because the number of classes is usually much smaller.

---

**Algorithm 1** Variational Forward Feature Selection (VMI)

---

**Data:**  $(\mathbf{x}^{(1)}, \mathbf{y}^{(1)}), (\mathbf{x}^{(2)}, \mathbf{y}^{(2)}), \dots, (\mathbf{x}^{(N)}, \mathbf{y}^{(N)})$   
**Input:**  $T \leftarrow \{\text{number of features to select}\}$   
**Output:**  $F \leftarrow \{\text{final selected feature set}\}$   
 $F \leftarrow \{\emptyset\}; S^0 \leftarrow \{\emptyset\}; t \leftarrow 1$   
Initialize  $Q_0^{(k)}$  and  $C_{i,0}^{(k)}$  for any feature  $i$ ; calculate  $Y$   
**while**  $|F| < T$  **do**  
     $\hat{I}_{LB}(\mathbf{x}_{S^{t-1} \cup i} : \mathbf{y}) \leftarrow \{\text{Eq. 24 for each } i \text{ not in } F\}$   
     $f_t \leftarrow \arg \max_{i \notin S^{t-1}} \hat{I}_{LB}(\mathbf{x}_{i \cup S^{t-1}} : \mathbf{y})$   
    **if**  $\hat{I}_{LB}(\mathbf{x}_{S^{t-1} \cup f_t} : \mathbf{y}) \leq \hat{I}_{LB}(\mathbf{x}_{S^{t-1}} : \mathbf{y})$  **then**  
        Clear  $S$ ; Set  $t \leftarrow 1$   
    **else**  
         $F \leftarrow F \cup f_t$   
         $S^t \leftarrow S^{t-1} \cup f_t$   
        Update  $Q_t^{(k)}$  and  $C_{i,t}^{(k)}$   
         $t \leftarrow t + 1$   
    **end if**  
**end while**

---

## B Optimality Under Tree Graphical Models

**Theorem B.1** (Optimal Feature Selection). *If data is generated according to tree graphical models, where the class label  $\mathbf{y}$  is the root node, denote the child nodes set in the first layer as  $\mathcal{L}_1 = \{\mathbf{x}_1, \mathbf{x}_2, \dots, \mathbf{x}_{L_1}\}$ , as shown in Fig. B.1. Then there must exist a step  $T > 0$  such that the following three conditions hold by using  $\mathcal{VM}_{naive}$  or  $\mathcal{VM}_{pairwise}$ :*

*Condition I: The selected feature set  $S^T \subset \mathcal{L}_1$ .*

*Condition II:  $I_{LB}(\mathbf{x}_{S^t} : \mathbf{y}) = I(\mathbf{x}_{S^t} : \mathbf{y})$  for  $1 \leq t \leq T$ .*

*Condition III:  $I_{LB}(\mathbf{x}_{S^T} : \mathbf{y}) = I(\mathbf{x} : \mathbf{y})$ .*

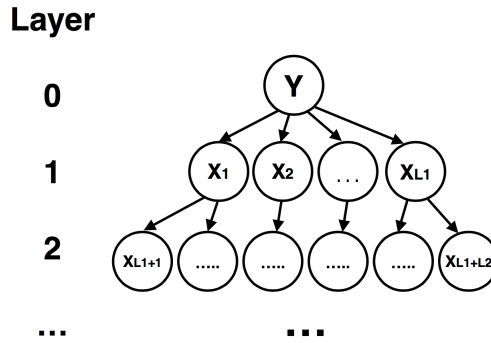

Figure B.1: Demonstration of tree graphical model, label  $\mathbf{y}$  is the root node.

*Proof.* We prove this theorem by induction. For tree graphical model when selecting the first layer features,  $\mathcal{VM}_{naive}$  and  $\mathcal{VM}_{pairwise}$  are mathematically equal, therefore we only prove  $\mathcal{VM}_{naive}$  case and  $\mathcal{VM}_{pairwise}$  follows the same proof.

1) At step  $t = 1$ , for each feature  $i$ , we have,

$$\begin{aligned}
I_{LB}(\mathbf{x}_i : \mathbf{y}) &= \left\langle \ln \left( \frac{q(\mathbf{x}_i | \mathbf{y})}{q(\mathbf{x}_i)} \right) \right\rangle_{p(\mathbf{x}, \mathbf{y})} \\
&= \left\langle \ln \left( \frac{p(\mathbf{x}_i | \mathbf{y})}{\sum_{\mathbf{y}'} p(\mathbf{y}') p(\mathbf{x}_i | \mathbf{y}')} \right) \right\rangle_{p(\mathbf{x}, \mathbf{y})} \\
&= \left\langle \ln \left( \frac{p(\mathbf{x}_i | \mathbf{y})}{p(\mathbf{x}_i)} \right) \right\rangle_{p(\mathbf{x}, \mathbf{y})} = I(\mathbf{x}_i : \mathbf{y})
\end{aligned} \tag{25}$$

Thus, we are choosing a feature that has the maximum mutual information with  $\mathbf{y}$  at the very first step. Based on the data processing inequality, we have  $I(\mathbf{x}_i : \mathbf{y}) \geq I(\text{desc}(\mathbf{x}_i) : \mathbf{y})$  for any  $\mathbf{x}_i$  in layer 1 where  $\text{desc}(\mathbf{x}_i)$  represents any descendant of  $\mathbf{x}_i$ . Thus, we always select features among the nodes of the first layer at step  $t = 1$  without loss of generality. If node  $\mathbf{x}_j$  that is not in the first layer is selected at step  $t = 1$ , denote  $\text{ances}(\mathbf{x}_j)$  as  $\mathbf{x}_j$ 's ancestor in layer 1, then  $I(\mathbf{x}_j : \mathbf{y}) = I(\text{ances}(\mathbf{x}_j) : \mathbf{y})$  which means that the information is not lost from  $\text{ances}(\mathbf{x}_j) \rightarrow \mathbf{x}_j$ . In this case, one can always switch  $\text{ances}(\mathbf{x}_j)$  with  $\mathbf{x}_j$  and let  $\mathbf{x}_j$  be in the first layer, which does not conflict with the model assumption.

Therefore, condition I and II are satisfied in step  $t = 1$ .

2) Assuming condition I and II are satisfied in step  $t$ , then we have the following argument in step  $t + 1$ :

We discuss the candidate nodes in three classes, and argue that nodes in **Remaining-Layer 1 Class** are always being selected.

**Redundant Class** For any descendant  $\text{desc}(S^t)$  of selected feature set  $S^t$ , we have,

$$I(\mathbf{x}_{S^t \cup \text{desc}(S^t)} : \mathbf{y}) = I(\mathbf{x}_{S^t} : \mathbf{y}) = I_{LB}(\mathbf{x}_{S^t} : \mathbf{y}) \tag{26}$$

Eq. 26 comes from the fact that the  $\text{desc}(S^t)$  carries no additional information about  $\mathbf{y}$  other than  $S^t$ . The second equality is by induction.

Based on Eq. 12 and 26, we have,

$$\begin{aligned}
I_{LB}(\mathbf{x}_{S^t \cup \text{desc}(S^t)} : \mathbf{y}) &< I(\mathbf{x}_{S^t \cup \text{desc}(S^t)} : \mathbf{y}) \\
&= I(\mathbf{x}_{S^t} : \mathbf{y})
\end{aligned} \tag{27}$$

We assume here that the LHS is *strictly* less than RHS in Eq. 27 without loss of generality. This is because if the equality holds, we have  $p(\mathbf{x}_{S^t} | \mathbf{y}) p(\text{desc}(S^t) | \mathbf{y}) = p(\mathbf{x}^t, \text{desc}(S^t) | \mathbf{y})$  due to Theorem 3.1. In this case, we can always rearrange  $\text{desc}(S^t)$  to the first layer, which does not conflict with the model assumption.

Note that by combining Eqs. 26 and 27, we can also get

$$I_{LB}(\mathbf{x}_{S^t \cup \text{desc}(S^t)} : \mathbf{y}) < I_{LB}(\mathbf{x}_{S^t} : \mathbf{y}) \tag{28}$$

Eq. 28 means that adding a feature in **Redundant Class** will actually *decrease* the value of lower bound  $I_{LB}$ .

**Remaining-Layer1 Class** For any other unselected node  $j$  of the first layer, i.e.,  $j \in \mathcal{L}_1 \setminus S^t$ , we have

$$I(\mathbf{x}_{S^t} : \mathbf{y}) \leq I(\mathbf{x}_{S^t \cup j} : \mathbf{y}) = I_{LB}(\mathbf{x}_{S^t \cup j} : \mathbf{y}) \tag{29}$$

The inequality in Eq. 29 is obvious which comes from the data processing inequality [6]. And the equality in Eq. 29 comes directly from Theorem 3.1.

**Descendants-of-Remaining-Layer1 Class** For any node  $\text{desc}(j)$  that is the descendant of  $j$  where  $j \in \mathcal{L}_1 \setminus S^t$ , we have,

$$\begin{aligned}
I_{LB}(\mathbf{x}_{S^t \cup \text{desc}(j)} : \mathbf{y}) &\leq I(\mathbf{x}_{S^t \cup \text{desc}(j)} : \mathbf{y}) \\
I(\mathbf{x}_{S^t \cup \text{desc}(j)} : \mathbf{y}) &\leq I(\mathbf{x}_{S^t \cup j} : \mathbf{y})
\end{aligned} \tag{30}$$

The second inequality of Ineq. 30 also comes from data processing inequality.

Combining Eqs. 27 and 29, we get,

$$I_{LB}(\mathbf{x}_{S^t \cup \text{desc}(S^t)} : \mathbf{y}) < I_{LB}(\mathbf{x}_{S^t \cup j} : \mathbf{y}) \quad (31)$$

Combining Eqs. 29 and 30, we get,

$$I_{LB}(\mathbf{x}_{S^t \cup \text{desc}(j)} : \mathbf{y}) \leq I_{LB}(\mathbf{x}_{S^t \cup j} : \mathbf{y}) \quad (32)$$

Ineq. 31 essentially tells us the forward feature selection will always choose *Remaining-Layer1 Class* other than *Redundant Class*.

Ineq. 32 is saying we are choosing *Remaining-Layer1 Class* other than *Descendants-of-Remaining-Layer1 Class* without loss of generality (for the equality concern, we can have the same argument in step  $t = 1$ ).

Considering Ineqs. 31 and 32, in step  $t + 1$ , the algorithm chooses node  $j$  in *Remaining-Layer1 Class*, i.e.,  $j \in \mathcal{L}_1 \setminus S^t$ .

Therefore, condition I and II hold at step  $t + 1$ .

At step  $t + 1$ , if  $I_{LB}(\mathbf{x}_{S^t \cup j} : \mathbf{y}) = I_{LB}(\mathbf{x}_{S^t} : \mathbf{y})$  for any  $j \in \mathcal{L}_1 \setminus S^t$ , that means  $I(\mathbf{x}_{S^t \cup j} : \mathbf{y}) = I(\mathbf{x}_{S^t} : \mathbf{y})$ . Then we have,

$$I(\mathbf{x}_{S^t} : \mathbf{y}) = I(\mathbf{x}_{\mathcal{L}_1} : \mathbf{y}) = I(\mathbf{x} : \mathbf{y}) \quad (33)$$

The first equality in Eq. 33 holds because adding any  $j$  in  $\mathcal{L}_1 \setminus S^t$  will not increase the mutual information. The second equality is due to the data processing inequality under tree graphical model assumption.

Therefore, if  $I_{LB}(\mathbf{x}_{S^t \cup j} : \mathbf{y}) = I_{LB}(\mathbf{x}_{S^t} : \mathbf{y})$  for any  $j \in \mathcal{L}_1 \setminus S^t$ , we set  $T = t$ . Thus by combining condition II and Eq. 33, we have,

$$I_{LB}(\mathbf{x}_{S^T} : \mathbf{y}) = I(\mathbf{x}_{S^T} : \mathbf{y}) = I(\mathbf{x} : \mathbf{y}) \quad (34)$$

Then condition III holds.

□

## C Datasets and Results

Table 4 summarizes the datasets used in the experiment. Table 5 shows the complete results.

Table 4: **Dataset summary.**  $N$ : # samples,  $d$ : # features,  $L$ : # classes.

| Data       | $N$  | $d$  | $L$ | Source |
|------------|------|------|-----|--------|
| Lung       | 73   | 325  | 20  | [25]   |
| Colon      | 62   | 2000 | 2   | [25]   |
| Leukemia   | 72   | 7070 | 2   | [25]   |
| Lymphoma   | 96   | 4026 | 9   | [25]   |
| Splice     | 3175 | 60   | 3   | [26]   |
| Landsat    | 6435 | 36   | 6   | [26]   |
| Waveform   | 5000 | 40   | 3   | [26]   |
| KrVsKp     | 3196 | 36   | 2   | [26]   |
| Ionosphere | 351  | 34   | 2   | [26]   |
| Semeion    | 1593 | 256  | 10  | [26]   |
| Multifeat. | 2000 | 649  | 10  | [26]   |
| Optdigits  | 3823 | 64   | 10  | [26]   |
| Musk2      | 6598 | 166  | 2   | [26]   |
| Spambase   | 4601 | 57   | 2   | [26]   |
| Promoter   | 106  | 57   | 2   | [26]   |
| Gisette    | 6000 | 5000 | 2   | [4]    |
| Madelon    | 2000 | 500  | 2   | [4]    |

| Dataset           | mRMR                | JMI                 | MIM                 | CMIM               | CIFE               | $SPeC_{cMT}$        | $\mathcal{VM}_{naive}$ | $\mathcal{VM}_{pairwise}$ |
|-------------------|---------------------|---------------------|---------------------|--------------------|--------------------|---------------------|------------------------|---------------------------|
| Lung              | <b>10.9±(4.7)**</b> | 11.6±(4.7)          | 18.3±(5.4)          | 11.4±(3.0)         | 23.3±(5.4)         | 11.6±(5.6)          | <b>7.4±(3.6)*</b>      | 14.5±(6.0)                |
| Colon             | 19.7±(2.6)          | 17.3±(3.0)          | 22.0±(4.3)          | 18.4±(2.6)         | 23.5±(4.3)         | 16.1±(2.0)          | <b>11.2±(2.7)*</b>     | <b>11.9±(1.7)**</b>       |
| Leukemia          | 0.4±(0.7)           | 1.4±(1.2)           | 2.5±(1.1)           | 1.1±(2.0)          | 4.9±(1.9)          | 1.8±(1.3)           | <b>0.0±(0.1)*</b>      | <b>0.2±(0.5)**</b>        |
| Lymphoma          | 5.6±(2.8)           | 6.6±(2.2)           | 13.0±(6.4)          | 8.6±(3.3)          | 35.6±(4.3)         | 12.0±(6.6)          | <b>3.7±(1.9)*</b>      | <b>5.2±(3.1)**</b>        |
| Splice            | <b>13.6±(0.4)*</b>  | 13.7±(0.5)          | <b>13.6±(0.5)**</b> | 13.7±(0.5)         | 14.7±(0.3)         | 13.7±(0.5)          | 13.7±(0.5)             | 13.7±(0.5)                |
| Landsat           | 19.5±(1.2)          | 18.9±(1.0)          | 22.0±(3.8)          | 19.1±(1.1)         | 19.7±(1.7)         | 21.0±(3.5)          | <b>18.8±(0.8)*</b>     | <b>18.8±(1.0)**</b>       |
| Waveform          | <b>15.9±(0.5)*</b>  | <b>15.9±(0.5)*</b>  | 16.1±(0.8)          | 16.0±(0.7)         | 22.8±(2.2)         | <b>15.9±(0.6)**</b> | <b>15.9±(0.6)**</b>    | <b>15.9±(0.5)*</b>        |
| KrVsKp            | 5.1±(0.7)           | 5.2±(0.6)           | 5.3±(0.6)           | 5.3±(0.5)          | <b>5.0±(0.7)*</b>  | <b>5.1±(0.6)**</b>  | 5.3±(0.5)              | 5.1±(0.7)                 |
| Ionosphere        | 12.8±(0.9)          | 16.6±(1.6)          | 13.3±(0.9)          | 13.1±(0.8)         | 16.1±(1.6)         | 16.8±(1.6)          | <b>12.7±(1.9)**</b>    | <b>12.0±(1.0)*</b>        |
| Semeion           | 23.4±(6.5)          | 24.8±(7.6)          | 26.7±(9.7)          | 16.3±(4.4)         | 28.6±(5.8)         | 26.0±(9.3)          | <b>14.0±(4.0)*</b>     | <b>14.5±(3.9)**</b>       |
| Multifeat.        | 4.0±(1.6)           | 4.0±(1.6)           | 4.9±(2.3)           | 3.6±(1.2)          | 7.2±(3.0)          | 4.8±(3.0)           | <b>3.0±(1.1)*</b>      | <b>3.5±(1.1)**</b>        |
| Optdigits         | 7.6±(3.3)           | 7.6±(3.2)           | 7.9±(3.9)           | <b>7.5±(3.4)**</b> | 8.1±(4.2)          | 9.2±(6.0)           | <b>7.2±(2.5)*</b>      | 7.6±(3.6)                 |
| Musk2             | <b>12.4±(0.7)*</b>  | 12.8±(0.7)          | 14.0±(1.2)          | 13.0±(1.0)         | 13.2±(0.6)         | 15.1±(1.8)          | 12.8±(0.6)             | <b>12.6±(0.5)**</b>       |
| Spambase          | 6.9±(0.7)           | 7.0±(0.8)           | 7.3±(0.9)           | <b>6.8±(0.7)**</b> | 10.3±(1.8)         | 9.0±(2.3)           | <b>6.6±(0.3)*</b>      | <b>6.6±(0.3)*</b>         |
| Promoter          | 21.5±(2.8)          | 22.4±(4.0)          | 21.7±(3.1)          | 22.1±(2.9)         | 27.4±(3.2)         | 24.0±(3.7)          | <b>21.2±(3.9)**</b>    | <b>20.4±(3.1)*</b>        |
| Gisette           | 5.5±(0.9)           | 5.9±(0.7)           | 7.2±(1.2)           | 5.1±(1.3)          | 6.5±(0.8)          | 7.1±(1.3)           | <b>4.8±(0.9)**</b>     | <b>4.2±(0.8)*</b>         |
| Madelon           | 30.8±(3.8)          | <b>15.3±(2.6)**</b> | 16.8±(2.7)          | 17.4±(2.6)         | <b>15.1±(2.7)*</b> | 15.9±(2.5)          | 16.7±(2.7)             | 16.6±(2.9)                |
| # $W_1/T_1/L_1$ : | 11/4/2              | 10/6/1              | 11/6/0              | 10/7/0             | 15/0/2             | 13/2/2              |                        |                           |
| # $W_2/T_2/L_2$ : | 9/6/2               | 9/6/2               | 15/2/0              | 13/3/1             | 15/1/1             | 12/3/2              |                        |                           |

Table 5: Average cross validation error rate comparison of  $\mathcal{VM}$  against other methods. The last two lines indicate win(W)/tie(T)/loss(L) for  $\mathcal{VM}_{naive}$  and  $\mathcal{VM}_{pairwise}$  respectively.

## D Generating Synthetic Data

Here is a detailed generating process for synthetic tree graphical model data in the experiment.

Draw  $\mathbf{y} \sim \text{Bernoulli}(0.5)$

Draw  $\mathbf{x}_1 \sim \text{Gaussian}(\sigma = 1.0, \mu = \mathbf{y})$

Draw  $\mathbf{x}_2 \sim \text{Gaussian}(\sigma = 1.0, \mu = \mathbf{y}/1.5)$

Draw  $\mathbf{x}_3 \sim \text{Gaussian}(\sigma = 1.0, \mu = \mathbf{y}/2.25)$

Draw  $\mathbf{x}_4 \sim \text{Gaussian}(\sigma = 1.0, \mu = \mathbf{x}_1)$

Draw  $\mathbf{x}_5 \sim \text{Gaussian}(\sigma = 1.0, \mu = \mathbf{x}_1)$

Draw  $\mathbf{x}_6 \sim \text{Gaussian}(\sigma = 1.0, \mu = \mathbf{x}_2)$

Draw  $\mathbf{x}_7 \sim \text{Gaussian}(\sigma = 1.0, \mu = \mathbf{x}_2)$

Draw  $\mathbf{x}_8 \sim \text{Gaussian}(\sigma = 1.0, \mu = \mathbf{x}_3)$

Draw  $\mathbf{x}_9 \sim \text{Gaussian}(\sigma = 1.0, \mu = \mathbf{x}_3)$
